# Supplementary material
Source: Springer Nature journal article supplement (https://www.springermedizin.de/resource/supplementary/12885_2013_4153_MOESM4_ESM.pdf/9465582)
Supplement: MOESM4 [file 9465582]

**Additional file 3. PHD1 (A), PHD2 (B), PHD3 (C), FIH (D) transcript and protein levels in primary cancerous and histopathologically unchanged tissue samples from patient with CRC.**

**A.**

| PHD1                                         |            | primary cancerous tissues | histopathologically unchanged tissues | p value  |
|----------------------------------------------|------------|---------------------------|---------------------------------------|----------|
|                                              |            | median (range)            | median (range)                        |          |
|                                              | transcript | 3.278 (1.240-7.738)       | 3.515 (1.459-5.204)                   | 0.000296 |
|                                              | protein    | 2.612 (1.132-3.560)       | 2.968 (2.132-5.256)                   | 0.00416  |
| <b>Age (Years)</b>                           |            |                           |                                       |          |
| <60                                          | transcript | 3.264 (2.854-4.738)       | 3.394 (2.784-5.204)                   | 0.0387   |
|                                              | protein    | 2.549 (1.805-3.414)       | 3.000 (2.579-3.512)                   | 0.0576   |
| >60                                          | transcript | 3.303 (1.240-3.904)       | 3.758 (1.459-4.896)                   | 0.00428  |
|                                              | protein    | 2.612 (1.132-3.560)       | 2.962 (2.132-5.256)                   | 0.0279   |
| <b>Gender</b>                                |            |                           |                                       |          |
| Female                                       | transcript | 3.303 (1.241-3.904)       | 3.758 (1.459-4.896)                   | 0.00189  |
|                                              | protein    | 2.707 (1.779-3.414)       | 3.000 (2.132-5.256)                   | 0.0227   |
| Male                                         | transcript | 3.264 (2.854-4.738)       | 3.394 (2.784-5.204)                   | 0.0387   |
|                                              | protein    | 2.503 (1.132-3.560)       | 2.919 (2.152-4.011)                   | 0.063    |
| <b>CRC localization</b>                      |            |                           |                                       |          |
| Proximal colon<br>(cecum to transverse)      | transcript | 3.246 (2.790-3.899)       | 3.351 (2.905-4.318)                   | 0.176    |
|                                              | protein    | 2.838 (1.780-3.560)       | 3.139 (2.132-5.256)                   | 0.0137   |
| Distal colon<br>(splenic flexure to sigmoid) | transcript | 3.151 (2.854-3.669)       | 3.506 (2.784-4.328)                   | 0.00548  |
|                                              | protein    | 2.480 (2.167-2.549)       | 2.896 (2.470-3.001)                   | 0.0374   |
| Rectum                                       | transcript | 3.344 (1.240-4.388)       | 3.549 (1.459-5.204)                   | 0.0641   |
|                                              | protein    | 2.563 (1.132-3.414)       | 2.846 (2.152-3.704)                   | 0.0991   |
| <b>Histologic grade</b>                      |            |                           |                                       |          |
| G1                                           | transcript | 3.176 (3.157-3.266)       | 3.533 (3.122-4.318)                   | 0.513    |
|                                              | protein    | 2.207 (2.065-2.350)       | 2.462 (2.152-2.772)                   | 0.438    |
| G2                                           | transcript | 3.278 (1.240-4.388)       | 3.462 (1.459-5.204)                   | 0.0141   |
|                                              | protein    | 2.549 (1.132-3.413)       | 2.999 (2.316-4.848)                   | 0.0105   |
| G3                                           | transcript | 3.307 (2.854-3.754)       | 3.568 (3.029-4.896)                   | 0.0136   |
|                                              | protein    | 2.612 (2.623-3.414)       | 2.885 (2.132-5.256)                   | 0.521    |
| <b>Dukes Scale</b>                           |            |                           |                                       |          |
| A                                            | transcript | 3.276 (3.157-3.669)       | 3.872 (3.218-4.318)                   | 0.0476   |
|                                              | protein    | 2.543 (2.480-2.817)       | 2.470 (2.316-4.848)                   | 0.513    |
| B                                            | transcript | 3.305 (2.790-4.388)       | 3.487 (2.905-4.318)                   | 0.213    |
|                                              | protein    | 2.549 (1.132-3.216)       | 3.000 (2.442-3.358)                   | 0.0649   |
| C                                            | transcript | 3.344 (1.240-3.899)       | 3.691 (1.459-5.204)                   | 0.0115   |
|                                              | protein    | 2.744 (2.112-3.414)       | 2.954 (2.132-5.256)                   | 0.0932   |
| <b>Tumour stage</b>                          |            |                           |                                       |          |
| T1                                           | transcript | 3.279 (3.157-3.462)       | 3.872 (3.364-4.318)                   | 0.127    |
|                                              | protein    | 2.412 (1.921-2.498)       | 2.951 (0.939-3.020)                   | 0.517    |
| T2                                           | transcript | 3.508 (3.231-3.697)       | 3.567 (3.216-4.238)                   | 0.655    |
|                                              | protein    | 2.836 (2.480-2.982)       | 2.986 (2.470-4.848)                   | 0.1745   |
| T3                                           | transcript | 3.303 (1.240-4.388)       | 3.564 (1.459-5.204)                   | 0.00747  |
|                                              | protein    | 2.600 (1.132-3.414)       | 2.968 (2.132-5.256)                   | 0.0588   |
| T4                                           | transcript | 3.326 (3.124-3.767)       | 3.644 (3.176-4.218)                   | 0.337    |
|                                              | protein    | 2.437 (2.280-2.986)       | 2.951 (2.582-3.064)                   | 0.275    |

## B.

| PHD2             |                                              | primary cancerous tissues | histopathologically unchanged tissues | p value   |
|------------------|----------------------------------------------|---------------------------|---------------------------------------|-----------|
|                  |                                              | median (range)            | median (range)                        |           |
|                  | transcript                                   | 3.069 (1.842-4.147)       | 3.355 (2.561-4.552)                   | p<0.00001 |
|                  | protein                                      | 2.661 (0.374-4.132)       | 2.876 (1.749-5.545)                   | 0.00710   |
| Age (Years)      |                                              |                           |                                       |           |
|                  | <60                                          |                           |                                       |           |
|                  | transcript                                   | 3.070 (2.727-3.460)       | 3.361 (3.012-3.784)                   | 0.0243    |
|                  | protein                                      | 2.605 (0.374-3.188)       | 3.032 (2.337-4.867)                   | 0.000573  |
|                  | >60                                          |                           |                                       |           |
|                  | transcript                                   | 3.058 (1.842-4.174)       | 3.354 (2.561-4.552)                   | 0.000005  |
|                  | protein                                      | 2.660 (0.374-3.189)       | 2.813 (1.749-4.867)                   | 0.0230    |
| Gender           |                                              |                           |                                       |           |
|                  | Female                                       |                           |                                       |           |
|                  | transcript                                   | 3.042 (2.591-3.460)       | 3.438 (2.561-4.552)                   | 0.000028  |
|                  | protein                                      | 2.660 (1.616-3.077)       | 3.079 (2.157-5.545)                   | 0.050     |
|                  | Male                                         |                           |                                       |           |
|                  | transcript                                   | 3.088 (1.842-4.174)       | 3.264 (2.595-4.505)                   | 0.00254   |
|                  | protein                                      | 2.606 (0.374-3.188)       | 3.022 (2.337-4.867)                   | 0.000573  |
| CRC localization |                                              |                           |                                       |           |
|                  | Proximal colon<br>(cecum to transverse)      |                           |                                       |           |
|                  | transcript                                   | 3.035 (2.058-3.747)       | 3.360 (2.724-4.552)                   | 0.00611   |
|                  | protein                                      | 2.534 (0.374-2.730)       | 2.721(2.157-3.439)                    | 0.0364    |
|                  | Distal colon<br>(splenic flexure to sigmoid) |                           |                                       |           |
|                  | transcript                                   | 2.974 (2.727-3.515)       | 3.413 (2.561-4.129)                   | 0.00345   |
|                  | protein                                      | 2.846 (2.469-3.188)       | 3.227 (3.044-3.783)                   | 0.0281    |
|                  | Rectum                                       |                           |                                       |           |
|                  | transcript                                   | 3.108 (1.842-4.147)       | 3.237 (2.596-4.506)                   | 0.002167  |
|                  | protein                                      | 2.678 (1.109-4.132)       | 3.051 (1.749-5.545)                   | 0.0188    |
| Histologic grade |                                              |                           |                                       |           |
|                  | G1                                           |                           |                                       |           |
|                  | transcript                                   | 2.862 (2.770-3.198)       | 3.447 (2.973-4.129)                   | 0.0833    |
|                  | protein                                      | 2.000 (0.374-2.900)       | 2.700 (2.400-2.800)                   | 0.0615    |
|                  | G2                                           |                           |                                       |           |
|                  | transcript                                   | 3.054 (1.842-4.147)       | 3.230 (2.561-4.552)                   | 0.001285  |
|                  | protein                                      | 2.669 (1.108-4.132)       | 2.876 (2.116-5.545)                   | 0.0415    |
|                  | G3                                           |                           |                                       |           |
|                  | transcript                                   | 3.105 (2.591-3.515)       | 3.414 (3.049-4.113)                   | 0.000389  |
|                  | protein                                      | 2.574 (1.251-3.188)       | 3.104 (1.749-4.867)                   | 0.0576    |
| Dukes Scale      |                                              |                           |                                       |           |
|                  | A                                            |                           |                                       |           |
|                  | transcript                                   | 3.172 (2.905-3.515)       | 3.794 (2.982-4.552)                   | 0.0587    |
|                  | protein                                      | 2.100 (0.374- 2.300)      | 2.701 (2.402- 2.803)                  | 0.169     |
|                  | B                                            |                           |                                       |           |
|                  | transcript                                   | 3.105 (2.727-4.147)       | 3.319 (2.561-3.741)                   | 0.0707    |
|                  | protein                                      | 2.673 (2.209-3.188)       | 2.831 (2.157-3.915)                   | 0.7728    |
|                  | C                                            |                           |                                       |           |
|                  | transcript                                   | 3.069 (1.842-3.439)       | 3.385 (2.796-4.506)                   | 0.000327  |
|                  | protein                                      | 2.661 (1.108-4.132)       | 3.094 (1.749-5.545)                   | 0.00634   |
| Tumour stage     |                                              |                           |                                       |           |
|                  | T1                                           |                           |                                       |           |
|                  | transcript                                   | 3.172 (2.905-3.404)       | 3.492 (2.982-4.129)                   | 0.248     |
|                  | protein                                      | 2.229 (0.374-2.568)       | 2.458 (1.749-2.786)                   | 0.462     |
|                  | T2                                           |                           |                                       |           |
|                  | transcript                                   | 3.181 (3.009-3.515)       | 3.414 (3.122-4.552)                   | 0.0639    |
|                  | protein                                      | 2.568 (2.229-4.132)       | 2.749 (2.458-2.786)                   | 0.628     |
|                  | T3                                           |                           |                                       |           |
|                  | transcript                                   | 3.036 (2.271-4.147)       | 3.348 (2.561-4.505)                   | 0.000147  |
|                  | protein                                      | 2.667 (1.107-3.414)       | 3.065 (2.157-5.545)                   | 0.0294    |
|                  | T4                                           |                           |                                       |           |
|                  | transcript                                   | 3.273 (1.842-3.435)       | 3.411 (2.880-3.764)                   | 0.0782    |
|                  | protein                                      | 2.751 (1.616-3.011)       | 3.099 (2.685-3.120)                   | 0.275     |

**C.**

| PHD3                                         |            | primary cancerous tissues | histopathologically unchanged tissues | p value   |
|----------------------------------------------|------------|---------------------------|---------------------------------------|-----------|
|                                              |            | median (range)            | median (range)                        |           |
|                                              | transcript | 2.562 (1.941-4.245)       | 2.910 (2.005-5.062)                   | p<0.00001 |
|                                              | protein    | 2.481(0.677-3.590)        | 3.175 (0.939-5.518)                   | p<0.00001 |
| <b>Age (Years)</b>                           |            |                           |                                       |           |
| <60                                          | transcript | 2.634 (2.018-3.085)       | 3.378 (2.561-4.734)                   | 0.00791   |
|                                              | protein    | 2.505 (1.229-3.069)       | 3.227 (2.885-3.564)                   | 0.00601   |
| >60                                          | transcript | 2.534 (1.941-4.245)       | 2.901 (2.005-5.062)                   | 0.000016  |
|                                              | protein    | 2.464 (0.677-3.590)       | 3.121 (0.939-5.518)                   | 0.00001   |
| <b>Gender</b>                                |            |                           |                                       |           |
| Female                                       | transcript | 2.617 (2.008-3.085)       | 2.931 (2.005-5.062)                   | 0.000189  |
|                                              | protein    | 2.481 (1.229-3.590)       | 3.210 (0.939-4.638)                   | 0.000665  |
| Male                                         | transcript | 2.531 (1.941-4.245)       | 2.909 (2.233-4.734)                   | 0.000832  |
|                                              | protein    | 2.507 (0.677-3.533)       | 2.986 (2.484-5.518)                   | 0.00027   |
| <b>CRC localization</b>                      |            |                           |                                       |           |
| Proximal colon<br>(cecum to transverse)      | transcript | 2.556 (2.267-3.301)       | 2.794 (2.005-5.062)                   | 0.00536   |
|                                              | protein    | 2.756 (1.395-3.590)       | 3.358 (1.978-4.638)                   | 0.001725  |
| Distal colon<br>(splenic flexure to sigmoid) | transcript | 2.699 (2.023-3.156)       | 2.960 (2.329-3.665)                   | 0.0378    |
|                                              | protein    | 2.360 (1.538-2.604)       | 2.777 (0.939-5.518)                   | 0.0543    |
| Rectum                                       | transcript | 2.540 (1.941-4.245)       | 2.900 (2.233-4.866)                   | 0.000481  |
|                                              | protein    | 2.434 (0.677-3.025)       | 2.947 (2.484-5.439)                   | 0.00002   |
| <b>Histologic grade</b>                      |            |                           |                                       |           |
| G1                                           | transcript | 2.121 (1.941-4.245)       | 3.061 (2.233-3.890)                   | 0.438     |
|                                              | protein    | 2.398 (2.299-2.497)       | 2.030 (0.939-3.121)                   | 0.99      |
| G2                                           | transcript | 2.531 (2.008-4.245)       | 2.900 (2.005-4.875)                   | 0.000004  |
|                                              | protein    | 2.415 (0.677-3.590)       | 3.137 (1.978-4.638)                   | 0.000009  |
| G3                                           | transcript | 2.716 (1.984-3.158)       | 2.994 (2.283-5.062)                   | 0.0267    |
|                                              | protein    | 2.604 (1.229-3.021)       | 3.227 (2.501-5.518)                   | 0.00124   |
| <b>Dukes Scale</b>                           |            |                           |                                       |           |
| A                                            | transcript | 2.559 (2.008-3.308)       | 3.374 (2.794-4.866)                   | 0.0374    |
|                                              | protein    | 2.454 (1.865-2.727)       | 2.796 (0.939-5.518)                   | 0.149     |
| B                                            | transcript | 2.569 (2.193-3.156)       | 3.077 (2.005-3.741)                   | 0.00180   |
|                                              | protein    | 2.415 (1.394-2.988)       | 3.292 (2.841-4.309)                   | 0.000069  |
| C                                            | transcript | 2.662 (1.984-4.245)       | 2.898 (2.283-5.062)                   | 0.00680   |
|                                              | protein    | 2.639 (0.677-3.590)       | 3.358 (2.484-5.439)                   | 0.002     |
| <b>Tumour stage</b>                          |            |                           |                                       |           |
| T1                                           | transcript | 3.108 (2.910-3.308)       | 3.247 (2.900-3.594)                   | 0.99      |
|                                              | protein    | 2.410 (1.865-2.497)       | 2.951 (0.939-3.020)                   | 0.517     |
| T2                                           | transcript | 2.605 (2.338-3.158)       | 2.865 (2.761-3.665)                   | 0.0181    |
|                                              | protein    | 2.727 (2.604-2.945)       | 3.665 (2.564-5.518)                   | 0.175     |
| T3                                           | transcript | 2.572 (1.984-4.245)       | 2.951 (2.005-5.662)                   | 0.000221  |
|                                              | protein    | 2.464 (0.677-3.437)       | 3.212 (2.501-5.439)                   | 0.000002  |
| T4                                           | transcript | 2.706 (2.453-3.060)       | 3.161 (2.760-3.455)                   | 0.0374    |
|                                              | protein    | 2.506 (1.883-3.590)       | 3.617 (2.484-4.413)                   | 0.149     |

## D.

| FIH                                          |            | primary cancerous tissues | histopathologically unchanged tissues | p value |
|----------------------------------------------|------------|---------------------------|---------------------------------------|---------|
|                                              |            | median (range)            | median (range)                        |         |
|                                              | transcript | 3.080 (2.576-3.556)       | 3.131 (0.373-3.745)                   | 0.583   |
|                                              | protein    | 2.965 (1.217-5.310)       | 2.785 (0.962-4.394)                   | 0.0169  |
| <b>Age (Years)</b>                           |            |                           |                                       |         |
|                                              | <60        |                           |                                       |         |
|                                              | transcript | 3.154 (2.904-3.551)       | 3.265 (2.367-3.606)                   | 0.885   |
|                                              | protein    | 2.989 (1.437-3.449)       | 2.889 (2.552-3.055)                   | 0.248   |
| >60                                          | transcript | 3.071 (2.576-3.556)       | 3.108 (0.373-3.745)                   | 0.596   |
|                                              | protein    | 2.947 (1.217-5.310)       | 2.776 (0.963-4.394)                   | 0.0257  |
| <b>Gender</b>                                |            |                           |                                       |         |
|                                              | Female     |                           |                                       |         |
|                                              | transcript | 3.161 (2.731-3.551)       | 3.233 (0.373-3.706)                   | 0.411   |
|                                              | protein    | 2.927 (1.217-3.944)       | 2.803 (0.963-3.927)                   | 0.267   |
| Male                                         | transcript | 3.058 (2.576-3.556)       | 3.069 (2.367-3.745)                   | 0.795   |
|                                              | protein    | 2.983 (1.949-5.310)       | 2.776 (1.066-4.394)                   | 0.0210  |
| <b>CRC localization</b>                      |            |                           |                                       |         |
| Proximal colon<br>(cecum to transverse)      | transcript | 3.111 (2.756-3.556)       | 3.222 (2.692-3.705)                   | 0.291   |
|                                              | protein    | 2.811 (1.217-3.843)       | 2.743 (0.963-4.207)                   | 0.435   |
| Distal colon<br>(splenic flexure to sigmoid) | transcript | 3.040 (2.576-3.500)       | 3.243 (2.414-3.745)                   | 0.327   |
|                                              | protein    | 3.100 (1.949-5.310)       | 2.905 (1.066-4.394)                   | 0.375   |
| Rectum                                       | transcript | 3.128 (2.660-3.551)       | 3.063 (0.373-3.550)                   | 0.117   |
|                                              | protein    | 3.036 (1.437-4.433)       | 2.798 (1.776-3.927)                   | 0.031   |
| <b>Histologic grade</b>                      |            |                           |                                       |         |
| G1                                           | transcript | 3.108 (3.055-3.161)       | 2.889 (2.845-2.933)                   | 0.0869  |
|                                              | protein    | 3.059 (2.787-3.332)       | 2.665 (2.313-3.018)                   | 0.99    |
| G2                                           | transcript | 3.080 (2.576-3.511)       | 3.131 (1.768-3.706)                   | 0.589   |
|                                              | protein    | 3.016 (1.217-5.310)       | 2.878 (0.963-4.394)                   | 0.0226  |
| G3                                           | transcript | 3.169 (2.773-3.551)       | 3.169 (0.373-3.745)                   | 0.213   |
|                                              | protein    | 2.741 (2.276-2.741)       | 2.710 (2.139-3.452)                   | 0.520   |
| <b>Dukes Scale</b>                           |            |                           |                                       |         |
| A                                            | transcript | 3.041 (2.660-3.500)       | 2.883 (1.768-3.745)                   | 0.631   |
|                                              | protein    | 3.033 (2.844-3.836)       | 2.742 (1.066-3.025)                   | 0.0832  |
| B                                            | transcript | 3.089 (2.576-3.403)       | 3.243 (2.692-3.523)                   | 0.0522  |
|                                              | protein    | 2.916 (1.437-3.343)       | 2.745 (1.776-3.419)                   | 0.213   |
| C                                            | transcript | 3.154 (2.756-3.551)       | 3.169 (0.373-3.706)                   | 0.570   |
|                                              | protein    | 3.011 (1.217-4.433)       | 2.817 (2.139-3.702)                   | 0.153   |
| <b>Tumour stage</b>                          |            |                           |                                       |         |
| T1                                           | transcript | 3.230 (3.061-3.399)       | 3.109 (2.744-3.474)                   | 0.99    |
|                                              | protein    | 2.930 (2.844-3.016)       | 2.045 (1.066-3.025)                   | 0.99    |
| T2                                           | transcript | 3.206 (2.660-3.500)       | 3.169 (2.568-3.745)                   | 0.749   |
|                                              | protein    | 3.022 (2.276-4.052)       | 2.675 (2.245-3.452)                   | 0.465   |
| T3                                           | transcript | 3.131 (2.731-3.551)       | 3.147 (0.373-3.606)                   | 0.967   |
|                                              | protein    | 2.947 (1.437-3.836)       | 2.802 (1.776-3.702)                   | 0.0544  |
| T4                                           | transcript | 3.179 (2.576-3.511)       | 3.355 (3.244-3.700)                   | 0.200   |
|                                              | protein    | 2.729 (1.217-4.443)       | 2.717 (2.411-2.954)                   | 0.873   |

The PHD1/PHD2/PHD3/FIH transcript levels were standardized by the geometric mean of PBGD and hMRPL19 cDNA and expressed as decimal logarithm of multiples of these cDNA copies in calibrator. The amount of western blot-detected proteins was presented as the decimal logarithm PHD1/PHD2/PHD3/FIH to GAPDH band optical density ratio. p value - Unpaired, two-tailed t-test or U-Mann-Whitney test.
